# Supplementary material for: Circular RNAs are temporospatially regulated throughout development and ageing in the rat
Source: PubMed Central journal article supplement (PMC6385508; doi:10.1038/s41598-019-38860-9), 2019-02-22
Supplement: 41598_2019_38860_MOESM1_ESM.pdf [file 41598_2019_38860_MOESM1_ESM.pdf]

**Circular RNAs are temporospatially regulated throughout development and ageing in the rat**

Mahmoudi E, Cairns MJ

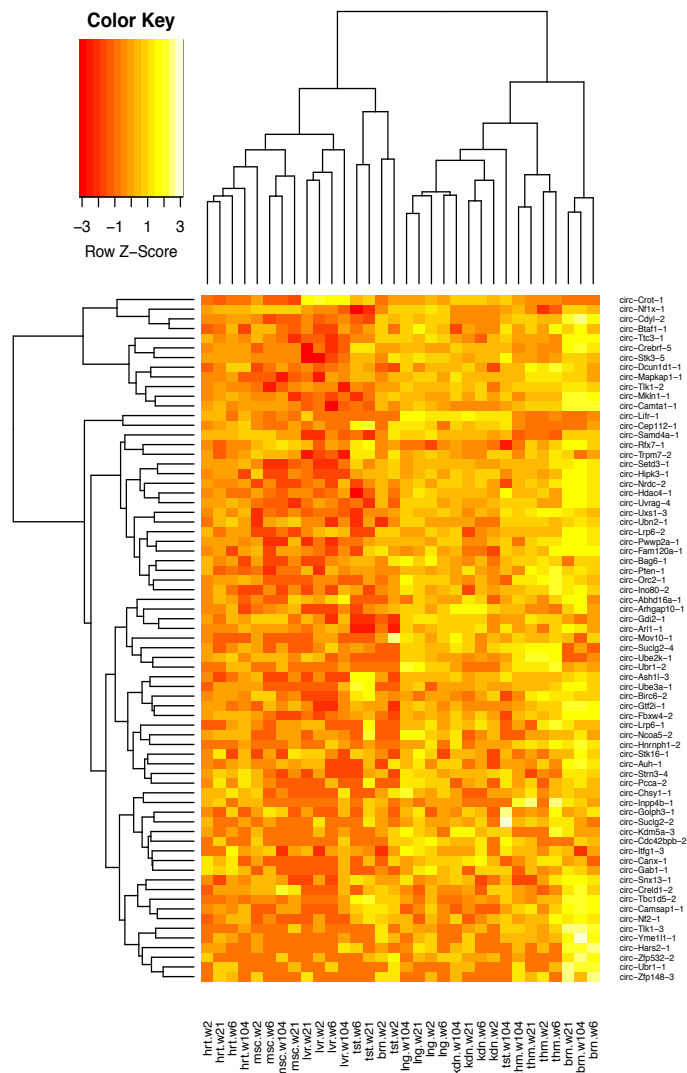

**Supplementary Figure 1.** Hierarchical and heatmap clustering of the shared circRNAs at different developmental stages.

| Organ  | Week 2  |      | Week 6 |      | Week 21 |      | Week 104 |      |
|--------|---------|------|--------|------|---------|------|----------|------|
|        | Female* | Male | Female | Male | Female  | Male | Female   | Male |
| Brain  | 1       | 0    | 2      | 2    | 2       | 3    | 2        | 2    |
| Heart  | 1       | 1    | 1      | 0    | 0       | 1    | 0        | 0    |
| Kidney | 1       | 0    | 0      | 0    | 3       | 2    | 0        | 2    |
| Liver  | 0       | 0    | 0      | 0    | 0       | 0    | 0        | 0    |
| Lung   | 1       | 0    | 2      | 1    | 1       | 2    | 1        | 0    |
| Muscle | 1       | 0    | 0      | 0    | 0       | 0    | 0        | 1    |
| Thymus | 1       | 2    | 1      | 4    | 3       | 0    | 0        | 0    |

**Supplementary Table 5. Number of circRNAs that were female-or male-dominant.**

\*Female: number of female-dominant circRNAs, DE circNRA between female and male: FC > 2 (Female/Male) with *p*-value <0.05. Male-dominant circNRA were detected as follows: FC > 2 (Female/Male) with *p*-value < 0.05.

| Organ  | Week 2        |         | Week 6        |         | Week 21       |         | Week 104      |         |
|--------|---------------|---------|---------------|---------|---------------|---------|---------------|---------|
|        | R coefficient | P-value | R coefficient | P-value | R coefficient | P-value | R coefficient | P-value |
| Brain  | 0.02          | 0.33    | 0.091         | 0.000   | 0.064         | 0.0019  | 0.11          | 0.000   |
| Heart  | 0.02          | 0.33    | 0.11          | 0.001   | 0.011         | 0.76    | 0.41          | 0.23    |
| Kidney | 0.01          | 0.67    | 0.11          | 0.00    | 0.83          | 0.00    | 0.065         | 0.024   |
| Liver  | 0.09          | 0.03    | 0.02          | 0.58    | 0.16          | 0.00    | 0.02          | 0.6     |
| Lung   | 0.06          | 0.01    | 0.06          | 0.01    | 0.06          | 0.01    | 0.05          | 0.06    |
| Muscle | 0.05          | 0.22    | 0.15          | 0.00    | 0.11          | 0.01    | 0.15          | 0.00    |
| Testes | 0.18          | 0.00    | 0.15          | 0.00    | 0.28          | 0.00    | 0.25          | 0.00    |
| Thymus | 0.13          | 0.00    | 0.16          | 0.00    | 0.06          | 0.01    | 0.04          | 0.1     |

**Supplementary Table 6. Correlations between circRNAs and their host genes in each stage.**
